# Supplementary material for: Molecular mechanism of anion size regulating the nanostructure and charging process at ionic liquid–electrode interfaces
Source: Royal Society of Chemistry journal article supplement (doi:10.1039/d0ta06643e), 2020-01-01
Supplement: d0ta06643e1.pdf [file d0ta06643e1.pdf]

## Supplementary Information for

### **Molecular Mechanism of Anion Size Regulating the Nanostructure and Charging Process at Ionic Liquids-Electrode Interfaces**

Yanlei Wang<sup>a,b,c</sup>, Cheng Qian<sup>a</sup>, Feng Huo<sup>a</sup>, Jingyu Qin<sup>a</sup>, and Hongyan He<sup>a,b,c,\*</sup>

*<sup>a</sup>Beijing Key Laboratory of Ionic Liquids Clean Process, CAS Key Laboratory of Green Process and Engineering, State Key Laboratory of Multiphase Complex Systems, Institute of Process Engineering, Chinese Academy of Sciences, Beijing 100190, China*

*<sup>b</sup>Zhengzhou Institute of Emerging Industrial Technology, Zhengzhou, 450000, China*

*<sup>c</sup>Innovation Academy for Green Manufacture, Chinese Academy of Sciences, Beijing 100190, China.*

**\*Corresponding Authors:**

Email: [hyhe@ipe.ac.cn](mailto:hyhe@ipe.ac.cn)

## Supplementary Tables:

**Table S1.** Estimated ion size of anion, the interaction energy between cation and anion in the bulk case, and total IL-graphite interaction. The anion size and the energy is calculated from the MD simulations.

| Ionic liquid        | Anion Size ( $\text{\AA}^3$ ) | $E_{\text{vdW}}$ (kcal/mol) | $E_{\text{coul}}$ (kcal/mol) | $E_{\text{total}}$ (kcal/mol) | $E_{\text{IL-Gra}}$ (kcal/mol) |
|---------------------|-------------------------------|-----------------------------|------------------------------|-------------------------------|--------------------------------|
| BmimBF <sub>4</sub> | 79                            | -5.66                       | -608.37                      | -614.03                       | -24.69                         |
| BmimPF <sub>6</sub> | 111                           | -8.52                       | -558.79                      | -567.31                       | -26.32                         |
| BmimOTf             | 126                           | -11.34                      | -531.71                      | -543.05                       | -30.50                         |
| BmimTFSI            | 233                           | -15.75                      | -397.56                      | -413.31                       | -39.50                         |

**Table S2.** The maximum electric field within EDL of different anion system against different potential, units ( $\text{V/\AA}$ )

| $U(\text{V})$ | BF <sub>4</sub> |       | PF <sub>6</sub> |       | OTf    |       | TFSI   |       |
|---------------|-----------------|-------|-----------------|-------|--------|-------|--------|-------|
|               | $-U/2$          | $U/2$ | $-U/2$          | $U/2$ | $-U/2$ | $U/2$ | $-U/2$ | $U/2$ |
| 0             | 0.65            |       | 0.62            |       | 1.22   |       | 1.54   |       |
| 0.4           | 0.61            | 0.81  | 0.73            | 0.68  | 1.04   | 1.42  | 1.36   | 1.76  |
| 0.8           | 0.52            | 0.84  | 0.70            | 0.70  | 0.95   | 1.52  | 1.40   | 1.92  |
| 1.0           | 0.50            | 0.91  | 0.66            | 0.70  | 0.85   | 1.80  | 1.65   | 1.96  |
| 2.0           | 0.70            | 1.10  | 0.55            | 0.74  | 0.53   | 1.83  | 1.41   | 1.92  |
| 3.0           | 0.76            | 1.25  | 0.80            | 0.69  | 0.46   | 2.08  | 0.93   | 2.38  |
| 4.0           | 0.72            | 1.31  | 0.72            | 0.73  | 0.65   | 2.06  | 0.39   | 2.70  |

**Table S3.** The stretching factor ( $\alpha$ ) of modified exponential function for different ILs at the different electrical potential.

| $U$ (V) | $\text{BF}_4$ | $\text{PF}_6$ | OTf   | TFSI  |
|---------|---------------|---------------|-------|-------|
| 2.0     | 0.343         | 0.370         | 0.399 | 0.454 |
| 1.5     | 0.198         | 0.422         | 0.429 | 0.448 |
| 1.0     | 0.279         | 0.380         | 0.722 | 0.536 |
| 0.5     | 0.217         | 0.374         | 0.399 | 0.32  |
| -0.5    | 0.202         | 0.370         | 0.387 | 0.28  |
| -1.0    | 0.264         | 0.356         | 0.705 | 0.525 |
| -1.5    | 0.219         | 0.428         | 0.376 | 0.442 |
| -2.0    | 0.333         | 0.369         | 0.364 | 0.416 |

**Table S4.** The number of anions and cations in different ionic liquid simulation systems.

| Ionic liquid       | Cation number (#) | Anion number (#) |
|--------------------|-------------------|------------------|
| Bmim $\text{BF}_4$ | 350               | 350              |
| Bmim $\text{PF}_6$ | 350               | 350              |
| BmimOTf            | 350               | 350              |
| BmimTFSI           | 350               | 350              |

## Supplementary figures and captions:

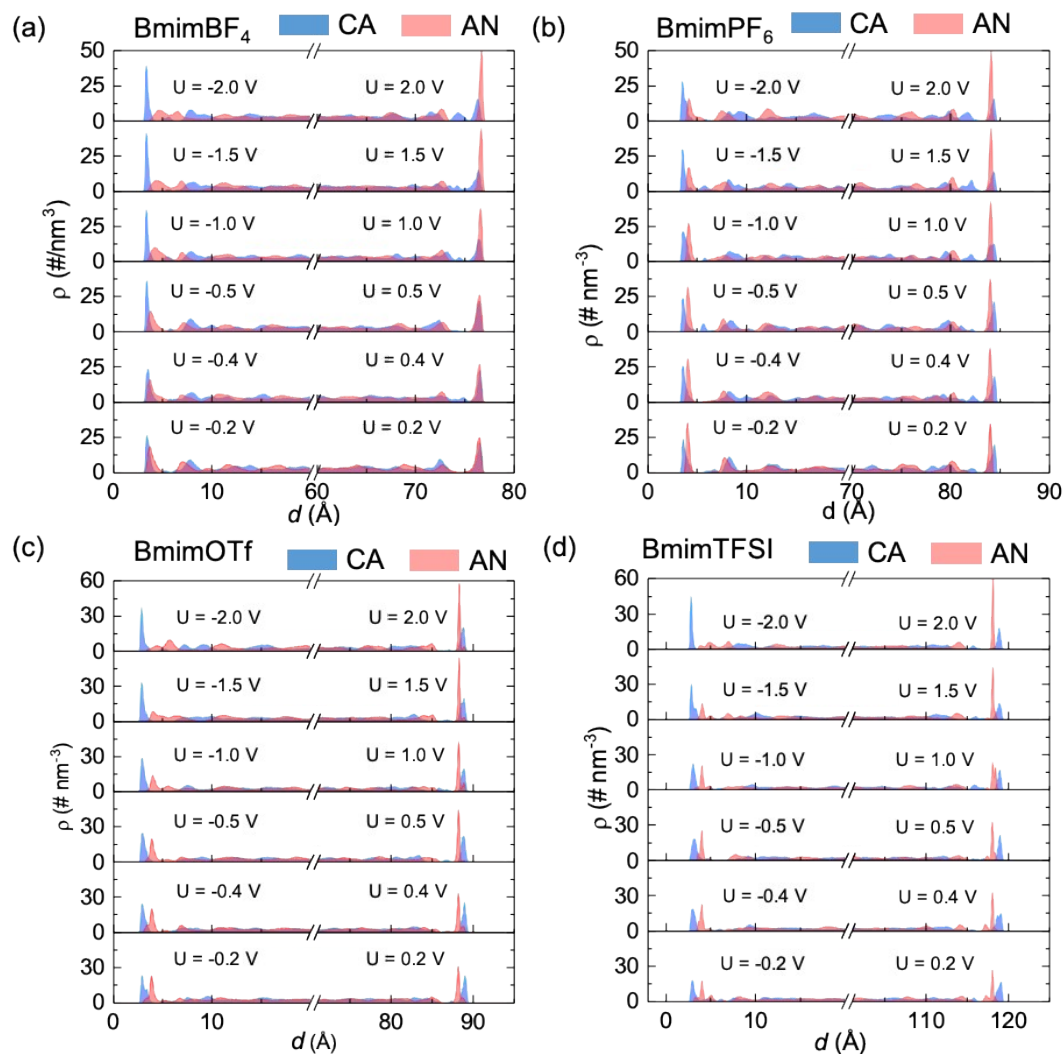

**Figure S1.** Centroid density distribution of different anions systems under different electrostatic potential: (a) BF<sub>4</sub>; (b) PF<sub>6</sub>; (c) OTf; (d) TFSI.

BmimBF<sub>4</sub>

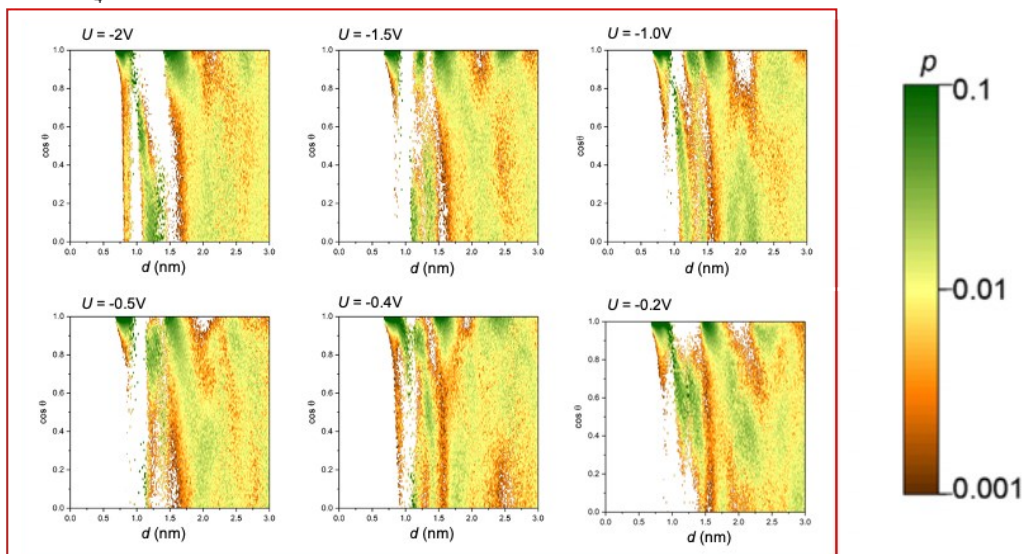

BmimPF<sub>6</sub>

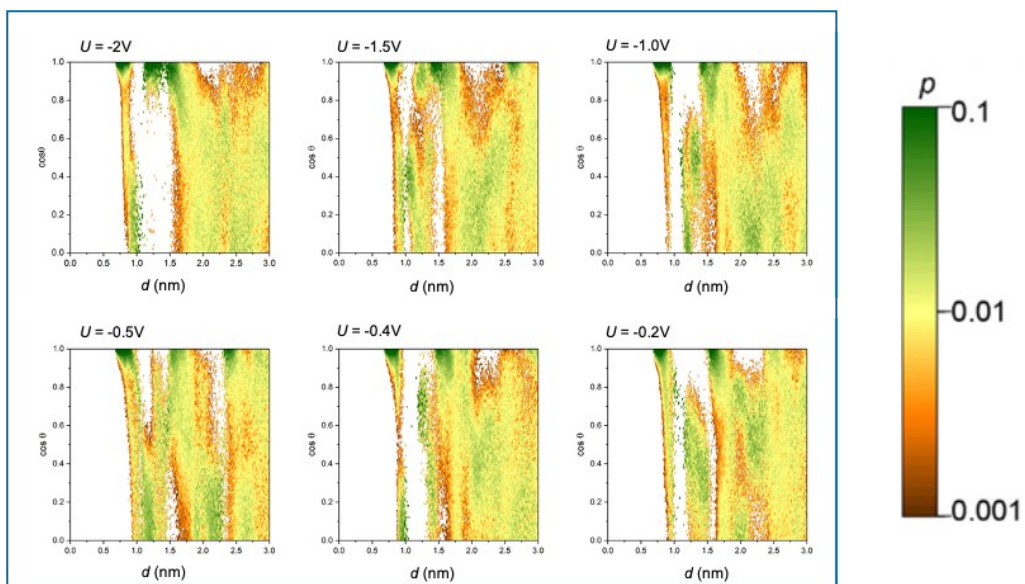

**Figure S2.** The 2D orientation plot for BmimBF<sub>4</sub> and BmimPF<sub>6</sub> near the electrode surface with potential from -2V to -0.2V, respectively.

### BmimOTf

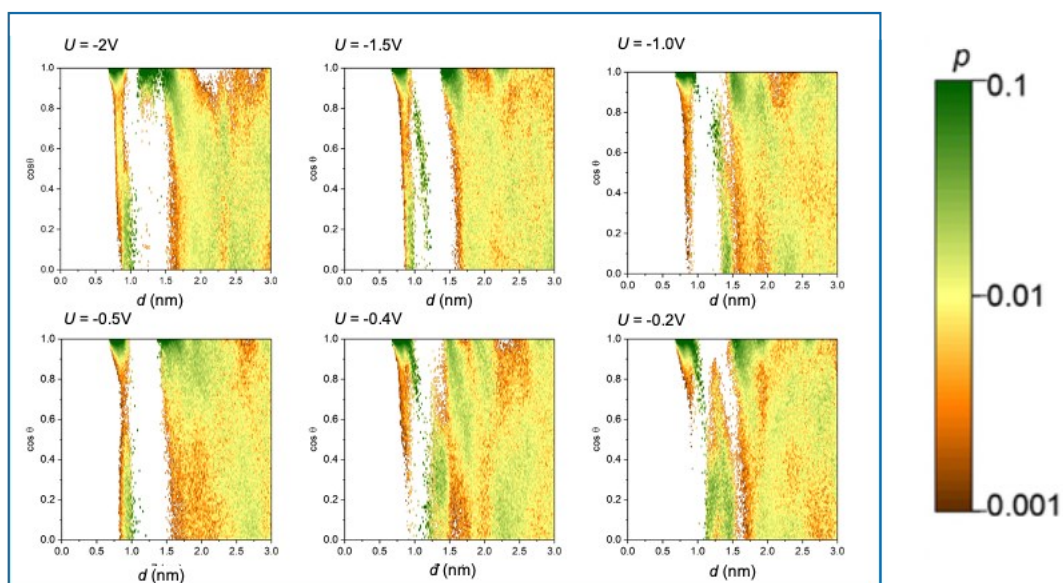

### BmimTFSI

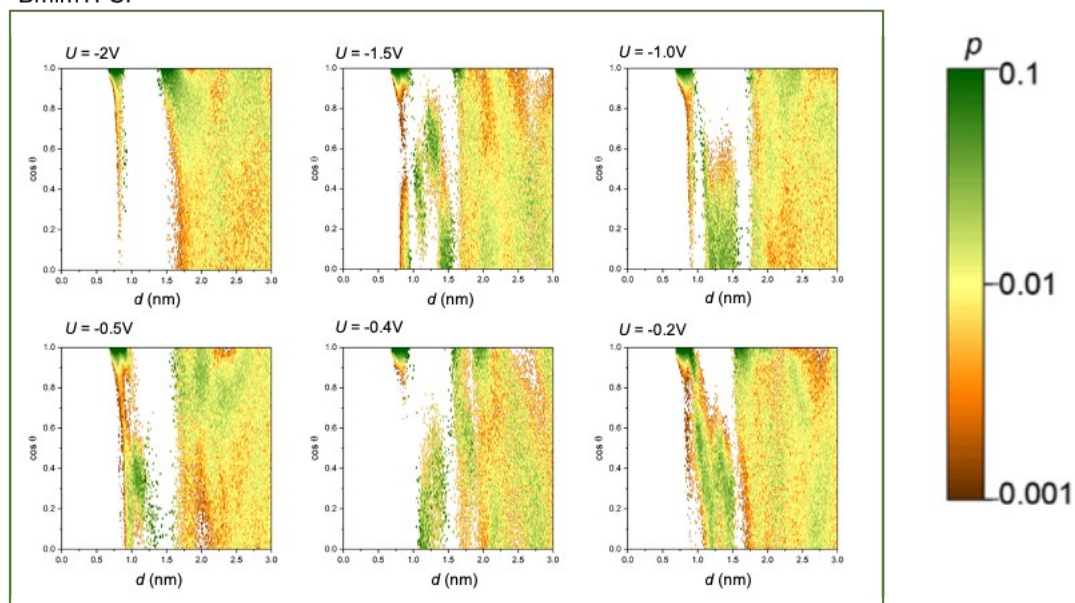

**Figure S3.** The 2D orientation plot for BmimOTf, and BmimTFSI near the electrode surface with potential from -2V to -0.2V, respectively.

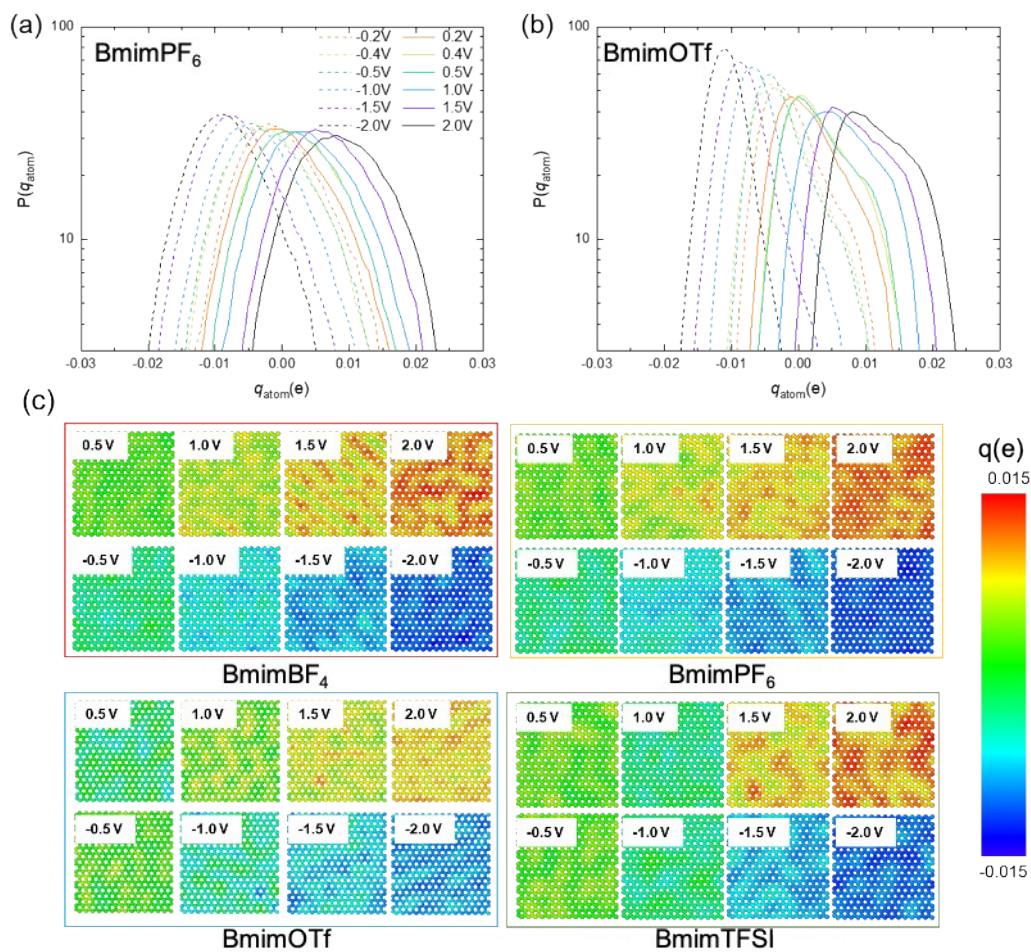

**Figure S4.** (a-b) The distribution of electrode atom charges at various electrostatic potential differences for BmimPF<sub>6</sub> and BmimOTf electrode interfaces. (c) The spatial distribution of charge on the electrode surface different interfaces.

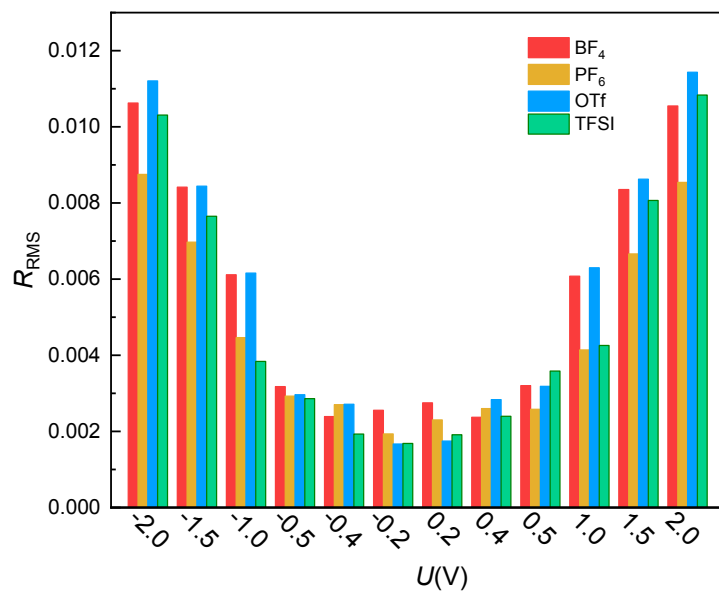

**Figure S5.** The roughness of the distribution  $R_{\text{RMS}}$  of the charge distribution of the first electrode layer under different surface potential for different IL systems.



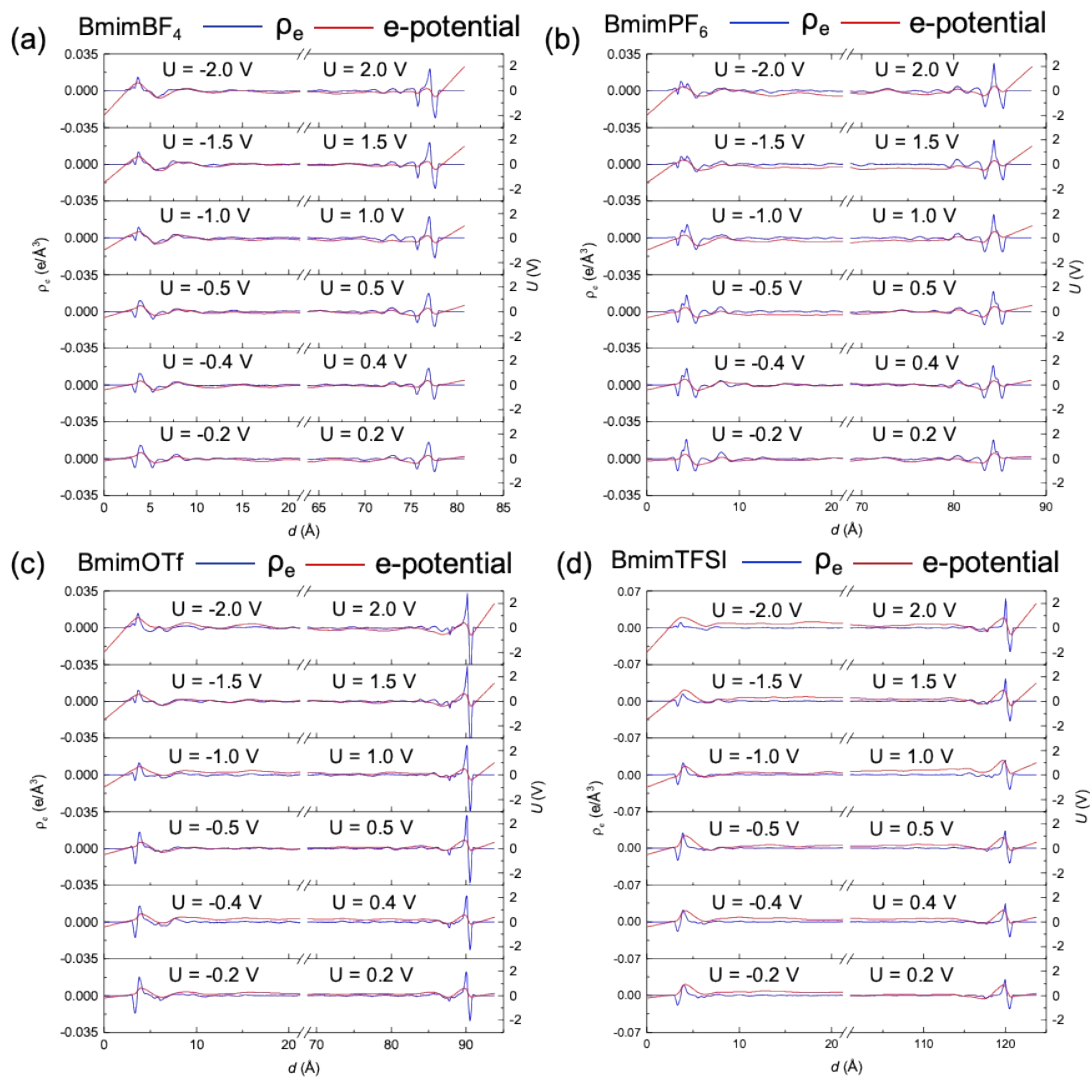

**Figure S6.** (a-d) The plane charge density and potential of the different anion system (BF<sub>4</sub>, PF<sub>6</sub>, OTf, and TFSI) along the  $z$ -direction at an electrostatic potential.

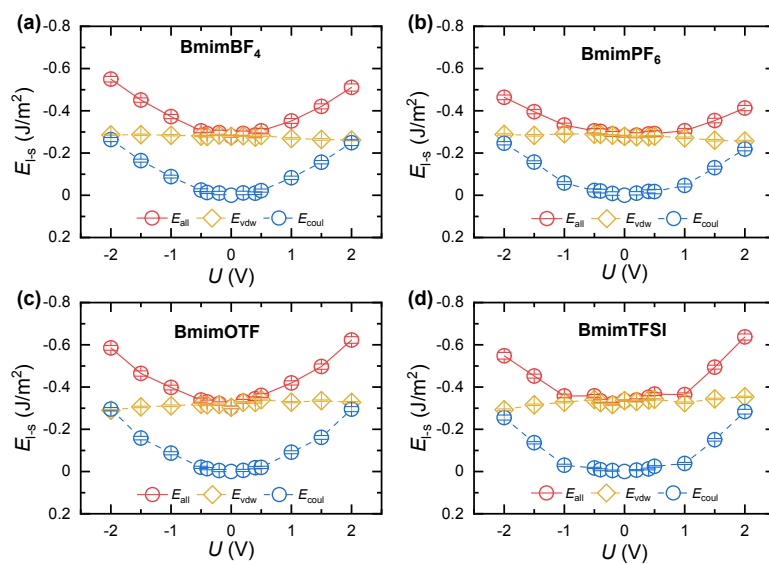

**Figure S7.** The interaction between electrode and ILs as a function of the external electrical potential: (a) BmimBF<sub>4</sub>; (b) BmimPF<sub>6</sub>; (c) BmimOTF; (d) BmimTFSI.

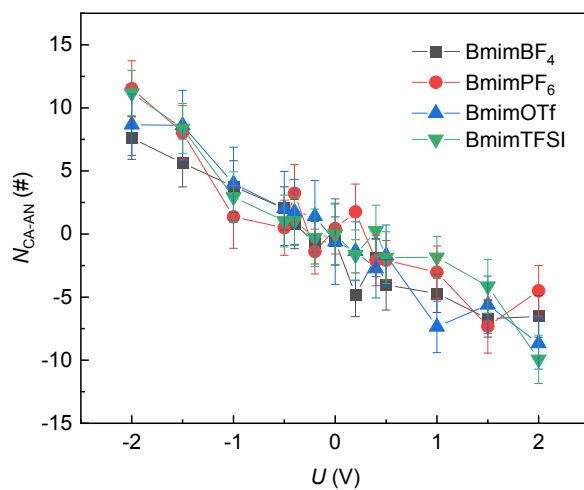

**Figure S8.** The number of the excess ion at the electrode interface for different ILs as a function of the electrode potential. The excess ion is defined as the difference between cation and anion ( $N_{CA}-N_{AN}$ ).

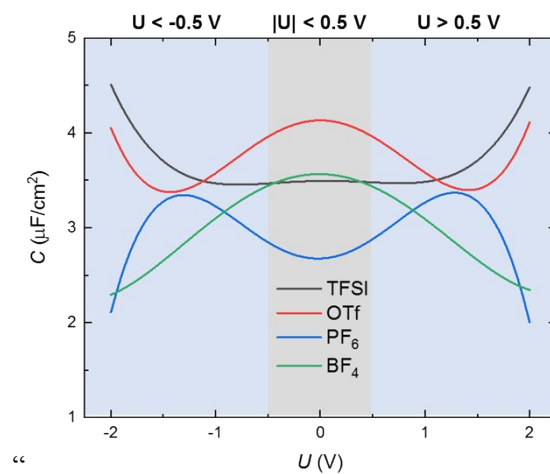

**Figure S9.** The differential capacitance as a function of the electrode potential for different ILs.

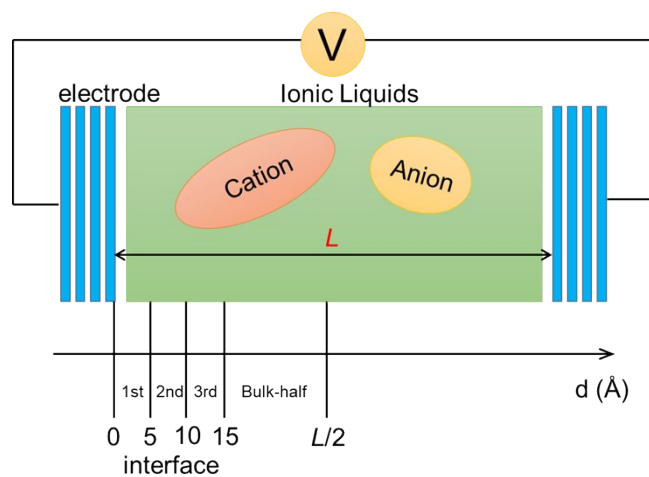

**Figure S10.** Schematic diagram of the division of the three-layer interface region and the bulk region.

## Supplementary Force Field Parameters:

In this work, Both the -CH<sub>2</sub>-, -CH<sub>3</sub>, and -CF<sub>3</sub> groups in [Bmim]<sup>+</sup>, [OTf]<sup>-</sup> and [TFSI]<sup>-</sup> were modeled as united atoms (UAs). The UA model is a good approximation in this work since the contribution of the high-frequency intramolecular vibrations atoms can be regarded as negligible. To correctly describe the movement of the ionic liquids, the charge of the cation and anion, the total charges (absolute values) on the cation/anion are scaled to 0.8. The specific parameters of van der Waals (vdW) interactions, electrostatic interactions, and bond, angle, dihedral for [Bmim]<sup>+</sup>, [BF<sub>4</sub>]<sup>-</sup>, [PF<sub>6</sub>]<sup>-</sup>, [OTf]<sup>-</sup>, and [TFSI]<sup>-</sup> are from previous work of Liu et. al.<sup>1</sup>

[1] Zhong, X.; Liu, Z.; Cao, D., Improved Classical United-Atom Force Field for Imidazolium-Based Ionic Liquids: Tetrafluoroborate, Hexafluorophosphate, Methylsulfate, Trifluoromethylsulfonate, Acetate, Trifluoroacetate, and Bis(trifluoromethylsulfonyl)amide. *Journal of Physical Chemistry B* **2011**, *115* (33), 10027-10040. DOI: 10.1021/jp204148q
